# Supplementary material
Source: publisher figshare collection journal article supplement (https://gsapubs.figshare.com/ndownloader/files/23320961)
Supplement: Supplementary file 1 [file 23320961]

## Sheet: Ch2
AnalysisName	Si	P	Ti	Y	Nb	Zr	La	Ce	Pr	Nd	Pm*	Sm	Eu	Gd	Tb	Dy	Ho	Er	Tm*	Yb	Lu	Hf	Th	U	Pb	Yb/Gd	"Best Age"
Zircon_115	3.85063	-6.00659	0.0554646	586.959	11.2475	19414.7	108.046	120.03	92.8576	79.4419	67.229	56.8937	17.4939	102.975	152.476	279.827	523.805	963.699	1456.58	2201.54	3142.63	98363.6	6498.59	46964.3	4.60734	21.3794	127.66
Zircon_158	3.4469	-2.90845	0.0333345	457.726	5.32733	19414.7	1.72828	4.87843	3.17987	4.85429	9.34864	18.0041	3.68571	73.3012	137.237	248.694	425.57	682.22	897.992	1182.01	1475.58	93438.3	1484.54	15131.8	1.28169	16.1253	131.704
Zircon_121	3.07136	5.25456	0.028856	1203.05	9.35576	19414.7	13.8678	21.176	17.3952	23.0733	37.4368	60.7418	24.7469	204.749	371.611	659.553	1151.26	1803.93	2322.06	2989.01	3755.34	79636.6	1192.85	11059.1	0.971851	14.5984	138.711
Zircon_135	3.18119	-1.46088	-0.0452876	402.79	12.0709	19414.7	0.32992	31.5124	3.86608	6.57785	13.4691	27.58	12.232	85.511	149.645	250.824	396.823	607.238	769.482	975.076	1231.16	116620	665.751	2971.36	2.07808	11.4029	1489
Zircon_134	3.13412	1.6279	0.0940739	1742.01	22.3946	19414.7	0.962126	7.86627	6.90363	17.3018	42.8382	106.065	37.0031	441.641	744.727	1173.26	1847.88	2591.19	3120.88	3758.85	4690.32	74845.1	1117.99	10350.8	7.91992	8.5111	1289
Zircon_157	3.19551	-2.38975	-0.0297737	822.699	52.8181	19414.7	0.574078	15.9968	2.64825	3.08794	8.84136	25.3145	3.45093	99.3917	223.123	427.509	779.978	1280.66	1732.73	2344.39	2937.69	113396	6307.23	93386.2	6.6845	23.5874	126.206
Zircon_132	2.93859	-28.4123	-0.0109836	2898.52	76.0783	19414.7	474.181	610.44	670.102	740.528	785.575	833.362	63.7686	1018.27	1229.55	1793.15	2908.63	4424.24	5739.41	7445.54	9264.83	123427	24164.1	226534	17.3253	7.31192	128.987
Zircon_151	3.79328	-1.04124	0.006721	830.362	17.4821	19414.7	26.276	39.0169	26.4063	26.2782	29.9262	34.0807	8.45874	99.4376	193.758	388.566	777.938	1361.23	1978.44	2875.5	3987.19	102949	4210.24	51758.6	3.85522	28.9176	128.987
Zircon_149	3.03104	2.17192	0.00829704	696.733	10.5187	19414.7	0.286898	18.4905	3.46288	4.27503	8.62114	17.3856	6.44399	79.3076	153.076	317.29	609.422	1093.27	1586.99	2303.66	3128.11	103383	8111.53	68372.2	5.18081	29.0472	129.493
Zircon_112	3.41464	0.242987	0	836.269	11.362	19414.7	0.480566	11.6518	3.48318	5.71975	13.2911	30.8847	9.48522	119.748	238.263	460.879	834.823	1347.26	1755.54	2287.55	2855.34	81983.2	5653.02	45506.2	3.35042	19.103	129.998
Zircon_128	3.85624	-1.12609	-0.00703046	664.003	6.67459	19414.7	0.346872	7.70563	3.23319	4.77125	9.8632	20.3893	3.01843	99.9915	191.906	364.15	655.095	1057.47	1406.51	1870.76	2343.91	93650	2493.89	25448.7	1.98192	18.7092	131.198
Zircon_124	3.3713	-77.9333	-0.0134295	1656.45	14.9371	19414.7	2540.97	2765.27	3011.76	3122.23	2867.1	2632.82	238.295	2433.82	1894.44	1728.59	1841.02	2017.38	2158.78	2310.08	2579.22	90795.5	3227.25	31074.9	2.6966	0.949157	133.598
Zircon_113	3.51073	-2.35984	0.0691158	813.127	7.15449	19414.7	0.6172	6.90085	3.50781	4.99432	11.9739	28.7072	11.7811	125.022	251.643	458.589	812.007	1281.38	1670.87	2178.75	2722.74	83900.5	2546.42	23203.2	1.9665	17.427	134.987
Zircon_133	2.79578	1.30833	-0.0554552	1251.54	8.92593	19414.7	0.93322	17.6948	5.08099	11.2488	26.5705	62.7615	23.1772	242.57	419.187	726.608	1276.58	1976.73	2566.26	3331.61	4200.58	93994.6	5468.51	34384.9	3.1619	13.7347	135.303
Zircon_118	3.14506	1.83775	-0.0749198	1749.51	5.88753	19414.7	0.66364	1.21335	4.48185	4.72795	11.5857	28.3902	2.48601	158.429	393.805	843.911	1604.17	2812.3	3885.63	5368.61	6681.58	110808	1169.94	34256.6	3.32132	33.8865	164.465
Zircon_127	3.58666	-0.667443	0.00260843	629.23	4.8043	19414.7	0.370798	3.17067	4.39636	6.64363	15.2402	34.9603	6.83263	134.41	233.192	389.211	656.082	983.511	1258.52	1610.44	1994.86	75999.3	1364.74	11602.7	1.31262	11.9815	174.01
Zircon_114	3.35261	0.455981	0.0324813	1194.52	10.2788	19414.7	31.6869	56.6411	50.1001	65.5848	94.3714	135.793	19.8986	363.525	531.922	815.917	1239.99	1730.66	2079.03	2497.52	3003.39	77276.6	4199.49	16947.4	4.20949	6.8703	364.072
Zircon_111	3.71791	1.47655	0.0933176	518.644	9.45846	19414.7	0.567889	24.6042	5.1446	6.21839	14.5976	34.2679	41.8161	109.884	183.894	317.782	514.776	803.159	1080.85	1454.54	1850.14	93147.7	2347.8	13110.8	3.41999	13.2371	401.736
Zircon_130	3.37395	1.05773	0.0590642	1334.34	10.8606	19414.7	0.605931	10.8393	3.84832	5.88088	14.1709	34.1471	9.86161	169.745	357.737	695.952	1276.11	2103.37	2822.33	3787.05	4751.05	98910	4135.88	39159.3	10.9137	22.3103	459.024
Zircon_154	3.28324	-2.16186	0.0647382	2837.09	22.0727	19414.7	0.488982	12.0325	3.34874	5.71348	15.7885	43.6295	10.4089	240.882	626.202	1347.7	2644.86	4676.29	6511.2	9066.09	11294.3	115645	7766.48	105253	29.2134	37.637	463.825
Zircon_116	3.52496	2.12607	0.0580898	1076.32	48.0818	19414.7	0.48411	36.1595	3.93598	7.68632	18.3379	43.7502	6.48876	190.534	357.746	635.183	1091.76	1687.98	2116.25	2653.18	3174.81	99955.6	11182.3	79842.7	24.5901	13.9249	485.385
Zircon_138	3.46792	-0.530515	-0.0118619	603.304	10.988	19414.7	3.6275	50.6943	5.91699	5.81405	10.2485	18.0653	16.6981	64.7074	132.553	252.259	521.079	980.224	1543.54	2430.58	3559.11	97991.2	2762.22	14566.3	2.4732	37.5626	264.917
Zircon_152	3.30738	-0.917083	-0.0542383	706.277	5.80923	19414.7	0.440614	27.8091	4.54008	10.3182	22.4201	48.716	31.7061	146.191	232.148	387.149	656.106	1059.1	1458.77	2009.26	2587.72	98192	4805.44	19699	3.69776	13.744	276.353
Zircon_145	2.87147	1.57051	0.102848	240.93	5.3489	19414.7	0.343794	17.3721	3.2813	3.05085	5.86842	11.2881	9.67558	30.1388	53.2646	103.151	202.254	384.186	616.528	989.382	1523.37	102952	1546.67	13254.8	2.9152	32.8275	279.44
Zircon_141	3.68821	5.29175	0.284919	1281.33	20.4185	19414.7	1.44744	7.5468	6.40057	7.28735	16.1385	35.7401	21.0214	137.283	326.184	635.27	1166.41	2096.93	3049.83	4435.77	5647.35	119406	5699.25	103384	18.2814	32.3112	293.007
Zircon_159_2A	2.76382	2.71057	0.0747755	256.919	4.38957	19414.7	0.557198	15.109	2.95365	4.07412	7.80413	14.9491	5.8048	38.7557	71.7424	130.786	225.05	371.779	500.017	672.489	890.154	105306	6098.84	21286	8.62353	17.352	567.963
Zircon_140	3.75771	1.64427	0.0385627	84.7622	8.22153	19414.7	0.550182	8.28754	4.01862	5.55851	12.2271	26.8962	3.14508	57.2295	72.7399	83.6494	92.7386	94.5444	88.0862	82.069	80.0432	117463	444.407	7237.54	2.42393	1.43403	580.347
Zircon_156	3.24242	5.36926	-0.0211607	253.533	5.43477	19414.7	0.359561	19.6431	2.89818	4.56072	7.33328	11.7913	11.8705	48.069	74.5897	122.567	214.977	370.391	540.106	787.585	1123.09	96673.8	1530.81	11277.1	4.26976	16.3844	605.045
Zircon_139	3.45753	-3.03122	0.0299392	1062.03	16.3652	19414.7	0.302102	27.2524	3.99046	6.2219	17.2379	47.7579	9.69011	198.901	363.163	652.597	1091.45	1656.67	2000.67	2416.11	2757.99	78526.5	2085.35	21923.2	8.89936	12.1473	617.944
Zircon_153	3.32304	-1.35911	-0.0205259	233.516	5.99756	19414.7	0.894974	18.868	3.31688	5.35553	9.0326	15.2343	13.0593	41.4245	70.2147	121.919	217.454	356.983	492.975	680.773	904.821	87821.4	1813.3	6509.58	3.21628	16.4341	687.852
Zircon_119	2.84361	2.20501	-0.010117	528.891	11.3517	19414.7	9.038	26.5125	17.5711	21.2637	31.0302	45.2826	3.97864	107.25	184.79	300.549	503.996	775.636	995.877	1278.65	1533.78	98980.2	2909.64	20409.6	10.4642	11.9222	762.167
Zircon_150	2.93652	-0.724728	-0.0223713	768.439	11.1293	19414.7	8.74922	44.4501	15.0294	18.4295	33.1285	59.5511	4.43275	161.91	276.527	460.662	735.465	1119.12	1401.61	1755.4	2075.7	100433	11636.2	29307.2	20.0045	10.8418	828
Zircon_137	3.08397	-2.91635	0.0466218	618.78	13.8018	19414.7	5.4389	19.7356	5.41209	6.02697	10.6125	18.687	5.32507	81.3928	149.524	290.388	554.627	964.279	1374.81	1960.11	2606.66	103250	2603.34	20080.9	11.7327	24.0821	866
Zircon_126	4.02081	2.15772	0.00960929	1020.91	5.27744	19414.7	0.280174	2.83934	2.89839	4.48229	10.5373	24.7718	2.84959	123.388	303.494	561.755	974.031	1630.96	2321.25	3303.71	4228.31	119181	1170	67151.1	40.6655	26.7749	975
Zircon_120	3.22305	-0.683576	-0.0519247	721.293	15.1494	19414.7	0.65173	20.9092	6.33938	10.302	21.046	42.9951	36.8686	134.778	227.379	377.012	661.884	1107.39	1631.62	2404	3365.13	92202.4	1491.68	17099.8	10.6969	17.8367	994
Zircon_122	3.31702	-2.79666	-0.000586183	94.0005	8.70006	19414.7	0.587575	16.2886	3.09813	4.25728	7.93206	14.7788	5.14464	31.9789	48.3136	66.1199	86.7939	106.416	124.333	145.265	170.384	91479.9	356.376	11589.7	6.10262	4.54253	1001
Zircon_143	3.20858	1.4173	0.00816683	536.959	64.8417	19414.7	0.534611	40.3443	3.34385	6.56804	16.2369	40.1394	2.98428	141.952	248.825	359.756	525.568	721.484	848.058	996.838	1336.24	146624	7123.33	33975.5	22.731	7.02239	1012
Zircon_129	3.57323	-0.553923	0.411157	1136.91	43.2866	19414.7	1.00837	24.4664	5.85431	5.47624	12.5471	28.7476	11.1131	128.413	265.983	544.917	1055.39	1895.33	2788.08	4101.32	5390.73	103889	6247.58	106911	71.1273	31.9386	1044
Zircon_142	3.44485	1.44166	0.0114144	420.929	13.7239	19414.7	0.359233	8.36218	3.37892	4.95492	10.1712	20.8788	2.29717	78.0121	140.074	251.813	412.165	647.084	847.886	1111	1390.47	106540	1176.42	18873.5	13.3231	14.2414	1162
Zircon_144	3.21266	1.1668	-0.0174563	753.445	16.5101	19414.7	0.663508	21.7888	4.38148	6.33492	12.4092	24.3079	13.7027	94.1335	207.855	388.135	707.297	1236.56	1800.69	2622.19	3426.56	104835	2218.83	32381.5	20.8509	27.8561	1171
Zircon_147	2.9132	-3.61681	0.00980379	425.182	9.30428	19414.7	0.419194	16.3454	3.22847	6.26125	12.2691	24.0418	10.1652	87.1554	138.482	238.917	406.994	641.514	841.311	1103.33	1417.16	102657	694.095	7594.87	4.78133	12.6594	1194
Zircon_117	3.20616	-2.09743	-0.000438427	709.532	16.0351	19414.7	0.783669	12.7701	4.58349	6.07915	13.6775	30.7729	8.97403	120.33	220.181	394.066	676.139	1075.01	1386.63	1788.58	2227.3	97019.4	2850.47	30348.4	24.3067	14.864	1263
Zircon_131	3.28177	3.53226	0.0163881	576.925	15.7695	19414.7	0.513841	27.3301	3.45075	5.52574	10.1738	18.7316	7.17019	83.2987	159.12	287.129	536.813	913.152	1269.29	1764.32	2309.27	92953.9	1674.04	14844.1	11.4855	21.1807	1296
Zircon_148	3.05705	1.56394	0.0739344	368.498	14.9614	19414.7	0.521988	7.69996	3.45028	3.6549	7.67675	16.1242	3.08171	60.2797	106.76	203.293	359.486	556.964	745.209	997.078	1296.69	94255.6	686.81	10724.9	8.80874	16.5409	1298
Zircon_123	3.41116	-3.47302	0.0761075	859.354	12.1818	19414.7	11.3118	31.6205	12.9235	15.6368	24.8767	39.5767	17.3382	149.472	269.515	485.05	851.767	1385.3	1885.64	2566.68	3244.66	80645	1456.01	14643.4	14.3971	17.1716	1491
Zircon_136	3.01576	7.03487	0.403279	622.384	14.1927	19414.7	0.48731	29.9591	3.69696	6.8515	14.878	32.3077	10.39	113.817	200.445	344.148	582.338	930.585	1224.6	1611.5	1997.49	97749	3852.28	18185.7	22.6139	14.1586	1687
Zircon_125	3.75435	-1.02001	0.0594723	919.363	15.6495	19414.7	3.65703	22.9096	7.22002	8.68149	16.3476	30.783	6.57057	112.295	242.423	476.456	872.717	1511.82	2095.43	2904.32	3786.22	95436.4	3446.76	40270.4	46.6862	25.8633	1699
Zircon_146	2.87941	2.8339	-0.00528984	171.152	7.54749	19414.7	0.385275	15.6747	3.70576	5.63128	9.33148	15.463	8.26545	42.0044	69.2777	100.733	172.853	267.719	357.979	478.669	682.702	86478	1084.07	9854.46	15.5351	11.3957	2108
																				Jurassic
	Population ca. 130 Ma							ca. 130 Ma not taken for mean calculation
															Many of the ca. 130 have strange patterns
															Some are strongly contaminated
																				Proterozoic 975-1050													1500- and older
	Early Paleozoic								Neoproterozoic
	Great heterogeneity in the REE patterns
	The only relatively homogeneous are:
	the non-contaminated 130 Ma
	the steep Jurassic
	the low Eu anomaly Permian
	the 1150-1300 are relatively parallel
	One Neoproterozoic grain grew with garnet
	Some of the late Mesoproterozoic have low Th/U or low REE slightly depressed

## Sheet: Ch3
AnalysisName	Si	P	Ti	Y	Nb	Zr	La	Ce	Pr	Nd	Pm*	Sm	Eu	Gd	Tb	Dy	Ho	Er	Tm*	Yb	Lu	Hf	Th	U	Pb	U2	Th3	Th/U	Yb/Gd	AnalysisName2	Prefered Age	Unc 2S
Zircon_170	3.51745	0.779022	-0.0212612	540.322	6.62843	19414.7	1.13176	27.5881	6.84844	8.77315	16.8585	32.3953	36.9956	91.911	151.533	264.806	468.94	799.656	1218.04	1855.31	2743.81	101975	4733.13	29946.2	4.6046	221.602	137.261	0.619402	20.1859	Zircon_170	249.307	6.07803
Zircon_219_1B	2.93857	0.776124	-0.039453	213.178	5.67722	19414.7	3.47952	19.1651	5.71617	7.61525	11.1263	16.2562	13.6476	29.4642	46.1145	75.7489	145.722	273.055	441.784	714.775	1211.72	119799	2153.8	20122.9	3.00385	148.909	62.4602	0.419451	24.2591	Zircon_219_1B	263.37	6.18856
Zircon_207	2.99768	1.3745	-0.0274267	223.189	5.77545	19414.7	0.334746	11.9027	2.70978	3.3875	5.40384	8.62035	6.50691	22.8535	44.925	90.5793	180.434	352.978	588.776	982.092	1556.96	105678	484.167	5696.34	0.790797	42.1529	14.0408	0.333093	42.9735	Zircon_207	265.227	9.28017
Zircon_190	3.05012	0.571718	-0.00240587	320.287	6.68183	19414.7	0.503354	31.164	2.85788	3.43084	6.19189	11.1749	10.7284	42.1057	73.5884	135.433	256.492	492.514	784.986	1251.14	2026.85	110040	2948.9	19841.9	3.46622	146.83	85.5182	0.58243	29.7142	Zircon_190	271.41	5.80999
Zircon_198	3.18238	2.67544	-0.0165313	325.867	9.92882	19414.7	0.757512	36.7155	2.41151	4.4415	7.61464	13.0548	9.99299	44.9118	79.7164	147.261	271.445	492.945	765.17	1187.73	1851.24	108028	4240.3	25823.9	4.39275	191.097	122.969	0.64349	26.4458	Zircon_198	271.534	5.80988
Zircon_199	2.94459	-2.84556	-0.0507036	702.968	7.2023	19414.7	11.6352	19.1814	11.7895	13.3433	19.8769	29.6097	16.73	97.3521	186.632	339.388	631.921	1080.48	1560.37	2253.4	3138.41	93363.9	1159.4	11744.7	1.95955	86.911	33.6226	0.386862	23.1469	Zircon_199	277.588	8.0274
Zircon_184	3.35053	-0.724429	-0.00927849	202.587	3.29529	19414.7	0.32699	21.906	2.62299	3.26415	5.32098	8.67387	11.8371	30.0253	48.7141	77.6581	150.345	276.71	457.919	757.796	1319.35	114658	5910.51	35290.8	7.15568	261.152	171.405	0.656342	25.2386	Zircon_184	278.206	8.02663
Zircon_188	3.0282	0.22385	0.074721	371.448	4.18278	19414.7	0.639242	7.21639	3.37828	5.16627	10.076	19.6518	15.7577	61.8006	117.05	201.858	330.081	544.709	757.744	1054.1	1388.9	77800.1	660.633	8674.07	5.96708	64.1881	19.1583	0.298472	17.0564	Zircon_188	1344	47
Zircon_172	3.12172	1.32641	0.0112711	670.064	29.499	19414.7	0.404901	40.1714	3.5942	5.10384	11.6051	26.3878	24.1351	95.0191	179.734	337.529	589.394	1014.06	1479.44	2158.39	3010.39	108790	4193.32	27072.8	16.5574	200.339	121.606	0.607003	22.7154	Zircon_172	271.41	142.159
Zircon_192	3.13461	3.2989	0.0781715	212.504	5.38417	19414.7	0.398214	12.3087	2.56393	3.34948	5.22586	8.15341	8.01558	26.3638	52.0805	93.4839	179.521	336.76	531.846	839.944	1270.29	91690.3	814.182	6253.23	1.04504	46.2739	23.6113	0.51025	31.8598	Zircon_192	263.989	7.42556
Zircon_180	3.14043	-6.71902	0.0419622	289.241	6.92034	19414.7	3.89864	29.5226	8.21299	9.68611	12.0989	15.1126	11.9955	42.4051	69.6767	126.76	233.861	425.759	670.567	1056.14	1694.41	105481	2054.85	15614.7	2.72288	115.549	59.5908	0.515721	24.9059	Zircon_180	268.938	6.80154
Zircon_171	3.3875	2.4029	0.0606121	998.645	18.7015	19414.7	45.881	74.3542	42.2346	38.3523	43.3222	48.936	33.5592	128.304	251.24	462.482	879.931	1554.37	2271.35	3319.06	4576.6	96192.6	4499.27	35519.8	5.89298	262.847	130.479	0.496406	25.8688	Zircon_171	271.596	5.5626
Zircon_164	3.04225	1.01786	0.0352544	1029.93	32.3418	19414.7	0.771538	75.7618	3.46164	5.71457	12.8049	28.6925	28.8596	130.721	250.414	467.399	871.731	1523.43	2254.73	3337.07	4638.22	110040	8079.4	49312.2	8.68312	364.91	234.303	0.642083	25.5282	Zircon_164	274.871	5.31267
Zircon_187	3.20307	-2.43638	-0.0114899	930.891	12.1006	19414.7	1.37587	58.8515	5.45936	9.99532	21.121	44.6304	42.357	151.712	264.181	451.294	811.685	1352.68	2002.11	2963.34	4175.97	98747.5	7499.58	33819.8	6.47314	250.267	217.488	0.869024	19.5327	Zircon_187	275.736	6.79437
Zircon_175	2.91348	-0.20614	-0.00736938	1314.43	18.268	19414.7	0.753392	67.5124	4.16277	9.58978	20.0575	41.9511	55.4935	210.584	369.78	658.715	1141.1	1905.79	2723.76	3892.8	5409.44	97520.4	7684.5	44129.9	7.77009	326.561	222.85	0.682416	18.4857	Zircon_175	277.094	5.86663
Zircon_206	3.00242	2.65984	-0.0470964	517.442	9.79342	19414.7	0.61387	32.696	3.0989	4.74008	9.81143	20.3085	18.7968	69.4212	126.601	240.257	446.747	802.147	1210.94	1828.05	2672.63	103490	2615.96	21012.7	3.5862	155.494	75.8628	0.487882	26.3328	Zircon_206	277.588	6.17493
Zircon_161	2.91565	2.31879	0.0515152	527.916	9.94402	19414.7	3.35201	42.2201	5.03949	5.78597	10.9639	20.7758	21.1399	77.9506	130.767	228.643	437.189	787.198	1196.13	1817.49	2803.35	111912	3588.18	22418.7	3.90746	165.898	104.057	0.627236	23.316	Zircon_161	277.773	5.80426
Zircon_182	3.24156	0.466829	-0.0282742	512.088	12.7079	19414.7	0.49831	46.7615	2.99749	4.21226	8.46964	17.03	15.5269	65.4577	123.992	231.185	436.711	789.861	1227.41	1907.35	2757.29	105942	4514.93	27768.6	4.9247	205.487	130.933	0.637182	29.1386	Zircon_182	278.144	5.80393
Zircon_181	3.16604	5.70896	-0.0109487	541.581	10.6141	19414.7	9.93197	40.0013	10.424	14.4467	22.791	35.9549	28.8981	79.8316	113.996	229.096	376.621	690.86	1071.88	1663.04	2397.89	105459	2717.32	21677	3.6824	160.41	78.8022	0.491255	20.8319	Zircon_181	278.206	6.17433
Zircon_211	3.13411	5.43891	0.110698	302.613	6.37755	19414.7	0.363427	24.3608	2.50457	2.87682	5.50924	10.5504	12.428	42.2582	67.3646	117.016	228.438	416.049	674.484	1093.45	1832.74	105732	1971.28	18469.7	3.05	136.676	57.1672	0.418268	25.8755	Zircon_211	280.058	6.78982
Zircon_203	2.7716	1.36931	-0.0110731	410.345	12.4784	19414.7	8.19441	44.1847	7.34738	6.89398	10.2504	15.2409	14.357	44.7824	87.5619	164.146	331.977	627.314	998.413	1589.04	2414.07	109365	2876.82	24466.7	4.15325	181.054	83.4277	0.460789	35.4837	Zircon_203	280.366	5.9871
Zircon_213	2.87626	2.89054	0.0098051	554.048	8.72398	19414.7	2.7659	29.2886	9.19382	14.0069	25.2159	45.3947	62.3111	111.062	208.02	294.567	448.64	718.775	1077.03	1613.85	2535.64	123779	4778.58	40722.5	6.04306	301.346	138.579	0.459865	14.531	Zircon_213	281.292	7.40565
Zircon_177	2.89605	-0.613955	0.000416479	408.354	9.54714	19414.7	0.507399	42.5467	3.77672	6.53091	12.5671	24.1824	27.7331	89.3117	124.366	194.234	325.712	545.811	819.521	1230.49	1889.31	110552	5119.22	24211.4	4.88193	179.165	148.457	0.828609	13.7775	Zircon_177	282.65	6.04668
Zircon_186	3.13863	-0.300687	-0.0497527	348.049	11.364	19414.7	0.365383	36.9223	2.97665	3.34271	7.55299	17.0663	13.9588	54.3792	98.8025	162.059	297.388	516.308	771.687	1153.38	1722.62	104951	3499.32	25753.7	4.5431	190.578	101.48	0.532487	21.21	Zircon_186	284.13	5.92192
Zircon_173	2.90032	3.37431	-0.0463537	387.31	9.94572	19414.7	0.474688	31.0343	2.39466	3.64811	7.19478	14.1895	14.1259	52.7403	92.5749	166.23	315.308	563.257	847.298	1274.57	1913.3	105606	2401.81	19092.7	3.35809	141.286	69.6524	0.49299	24.167	Zircon_173	284.377	6.16843
Zircon_216	3.08713	2.95157	0.0266462	659.521	8.6051	19414.7	0.414985	11.1834	3.2254	4.22779	8.07787	15.4341	13.4711	66.4475	136.673	277.199	548.748	1025.61	1561.32	2376.85	3468.57	87386.1	2704	28981.4	4.72992	214.463	78.4161	0.36564	35.7703	Zircon_216	285.611	6.16725
Zircon_218	3.07306	1.31252	0.0492463	439.032	8.06549	19414.7	0.498375	30.0741	2.49536	4.58634	8.65619	16.3376	15.2147	56.7515	103.257	183.289	358.012	644.732	996.149	1539.11	2451.04	105669	2643.05	20609.1	3.69664	152.507	76.6483	0.502588	27.1202	Zircon_218	286.227	6.16666
Zircon_178	3.07879	-1.72529	-0.011287	717.787	18.3432	19414.7	0.451783	18.4417	5.02089	11.8694	26.3022	58.2844	17.9963	178.36	291.467	451.448	675.476	1007.12	1254.34	1562.25	1921.14	94579.8	8004.55	47255.3	17.8688	349.689	232.132	0.663823	8.75896	Zircon_178	581.526	11.1921
Zircon_179	3.19983	-0.98114	0.0622006	414.26	8.00793	19414.7	0.332274	8.10828	2.84581	5.30307	10.4855	20.7325	5.13689	67.2593	135.183	238.478	384.826	568.152	691.991	842.823	916.105	115493	3862.98	39881.8	14.6044	295.125	112.026	0.379589	12.531	Zircon_179	617.358	12.3016
Zircon_183	3.52814	-5.84657	-0.0478703	838.117	30.9709	19414.7	0.313693	33.5896	3.38732	6.08938	13.7503	31.0492	5.15613	124.025	239.025	421.995	754.224	1242.09	1721.81	2386.8	3098.7	122677	12930.8	116726	74.0903	863.77	374.993	0.434135	19.2444	Zircon_183	932	41
Zircon_195	2.86566	6.22845	0.0290822	194.479	3.24132	19414.7	0.554887	4.08575	2.17866	2.67374	5.06698	9.60239	4.72096	23.5009	43.4736	84.649	164.62	298.904	448.181	672.01	952.137	97104.3	1771.35	71002.3	39.8428	525.417	51.3691	0.0977681	28.5951	Zircon_195	935	40
Zircon_205	2.78498	-1.12111	0.0893552	158.535	5.3182	19414.7	0.653582	7.23372	2.5151	3.05917	5.40545	9.55123	5.93501	20.6381	38.2892	70.7815	133.489	244.544	369.137	557.211	812.82	99111.6	1815.61	31672.8	18.5836	234.379	52.6528	0.224648	26.9991	Zircon_205	945	39
Zircon_162	3.09514	-2.77092	-0.0566125	299.498	13.0876	19414.7	1.38453	14.2603	3.84741	3.93739	7.10992	12.8387	4.20035	31.5812	65.0435	129.611	247.714	454.178	695.518	1065.1	1527.8	115326	4636.31	50885.7	29.269	376.554	134.453	0.357061	33.7258	Zircon_162	950	36
Zircon_204	3.13667	0.14995	-0.0261518	974.223	18.622	19414.7	0.46328	20.5538	5.49577	13.2614	27.0556	55.1984	20.3112	202.7	340.536	559.167	899.818	1345.24	1734.93	2237.5	2737.13	103416	2372.89	32312.9	19.2637	239.115	68.8139	0.287786	11.0385	Zircon_204	979	42
Zircon_215	3.26718	-1.69657	0.0699435	226.457	3.73126	19414.7	0.576265	1.70806	2.88522	4.18623	8.67585	17.9805	5.10301	93.6944	179.065	213.868	196.943	184.78	176.063	167.757	179.509	132014	445.398	38786.4	21.5782	287.019	12.9165	0.0450024	1.79047	Zircon_215	986	40
Zircon_210	3.48917	1.03247	-0.0324824	112.757	8.23178	19414.7	0.343788	6.05059	3.57086	5.98093	11.449	21.9164	3.74075	34.7507	43.7953	54.1486	94.056	170.529	247.491	359.188	528.408	112734	3897.94	27518.4	17.2408	203.636	113.04	0.555109	10.3361	Zircon_210	987	47
Zircon_212	3.2059	-0.318946	0.10757	135.547	7.69595	19414.7	0.519592	17.6369	3.54927	4.93455	10.9694	24.3847	3.20071	61.4965	90.613	108.182	123.514	143.598	156.896	171.425	205.186	127670	5390.74	39463.1	25.4232	292.027	156.331	0.535331	2.78756	Zircon_212	1004	49
Zircon_193	3.03665	2.60598	0.0533128	286.573	45.2061	19414.7	0.403641	26.353	4.02926	3.37608	6.24793	11.5627	1.96563	41.8531	83.5256	153.024	287.033	466.49	644.889	891.513	1232.73	118511	724.084	37897.5	23.0957	280.441	20.9984	0.0748763	21.301	Zircon_193	1056	45
Zircon_168	3.46386	-0.0827192	0.063483	230.657	9.21195	19414.7	0.490277	17.6366	3.03148	4.08368	6.39968	10.0292	3.05868	31.6487	57.0634	107.326	199.785	362.84	547.706	826.761	1153.31	112001	4910.75	57705.6	41.2832	427.022	142.412	0.3335	26.1231	Zircon_168	1058	37
Zircon_189	2.79136	-1.46814	0.0306711	251.274	11.2916	19414.7	0.594305	14.9352	2.62883	3.71369	6.52456	11.463	5.09284	33.1942	61.3422	115.645	220.158	390.639	574.598	845.186	1160.39	98397.1	1059.39	24041.1	14.3246	177.904	30.7222	0.17269	25.4618	Zircon_189	1064	39
Zircon_163	3.13232	0.605474	-0.0387191	545.382	12.2243	19414.7	1.34211	10.247	3.34716	5.23188	10.0872	19.4483	5.66206	73.0246	150.584	266.901	483.755	816.461	1105.53	1496.95	1957.94	100166	3346.2	45868.6	28.1738	339.428	97.0399	0.285893	20.4992	Zircon_163	1068	39
Zircon_176	3.11027	4.69537	0.0545991	520.596	14.8384	19414.7	0.462735	32.4137	3.41656	8.19409	17.5254	37.4831	8.41703	138.774	216.199	323.52	486.666	695.174	866.047	1078.92	1305.32	106255	4029.92	49064.3	33.3628	363.076	116.868	0.321883	7.77468	Zircon_176	1068	42
Zircon_160_1B	2.805	-0.655472	0.0111879	1378.85	42.9552	19414.7	1.73283	42.5049	5.31887	11.2516	23.1025	47.4352	14.0267	200.405	379.057	692.405	1242.16	2079.68	2830.03	3851.1	4739.76	103032	12485.5	152637	109.758	1129.51	362.08	0.320564	19.2166	Zircon_160_1B	1088	36
Zircon_197	3.00252	-0.43479	0.0191148	987.712	12.6018	19414.7	0.565835	27.645	4.99717	12.0102	27.5259	63.0859	12.5962	204.033	345.038	572.72	943.617	1434.43	1834.24	2345.5	2865.98	102496	5812.09	50774.3	36.7557	375.73	168.551	0.448595	11.4957	Zircon_197	1107	37
Zircon_174	2.95265	-1.06727	-0.0638373	1252.98	18.1491	19414.7	1.68915	29.0034	10.6961	19.1498	35.2524	64.895	29.9038	211.135	390.571	653.473	1138.81	1832.7	2468.73	3325.48	4184.8	91684.5	5301.42	66299.8	47.6753	490.618	153.741	0.313362	15.7505	Zircon_174	1110	44
Zircon_166	3.24648	3.48157	-0.0452082	487.23	11.0671	19414.7	0.498677	13.9653	3.19197	7.46722	15.3044	31.3672	10.66	98.1604	179.804	292.06	467.043	693.341	866.815	1083.69	1361.38	101577	1792.68	26307.2	18.8425	194.673	51.9877	0.267051	11.04	Zircon_166	1136	42
Zircon_209	3.25375	0.909703	0.100968	1151.89	364.054	19414.7	11.1283	29.5073	23.8953	28.337	42.2483	62.989	68.7049	168.705	289.185	498.472	966.572	1986.8	3360.39	5683.62	8587.82	123697	2403.06	120285	76.5056	890.11	69.6886	0.0782922	33.6897	Zircon_209	1139	54
Zircon_167	3.44343	0.621713	0.0471706	339.988	17.6164	19414.7	0.441121	13.0225	3.68168	4.52623	8.5374	16.1033	3.84108	59.0945	106.111	181.893	321.511	520.818	691.035	916.882	1117.09	108140	2501.55	48707.3	36.1257	360.434	72.545	0.201271	15.5155	Zircon_167	1148	63
Zircon_185	3.35515	2.36911	0.051241	1853.93	17.2441	19414.7	1.61888	25.6092	7.02696	14.8698	33.6768	76.2703	16.4515	320.701	588.648	1028.55	1733.4	2662.74	3369.51	4263.88	5129.86	89769.3	13506.4	96000.5	76.6368	710.404	391.687	0.551358	13.2955	Zircon_185	1148	28
Zircon_194	3.30277	-1.11054	0.00910737	1055.8	5.252	19414.7	2.71414	5.87384	5.07652	8.8245	19.9794	45.2351	2.6571	181.443	332.941	577.594	982.807	1523.23	1941.58	2474.83	3015.19	104383	3102.92	35284.1	26.5793	261.102	89.9847	0.344634	13.6397	Zircon_194	1181	42
Zircon_165	2.82331	-0.564719	-0.0194288	76.0322	4.07948	19414.7	0.511531	2.49144	2.53514	3.2597	4.34495	5.7915	3.79086	9.73979	18.2335	32.5312	59.8152	109.539	164.487	246.997	387.096	111795	188.923	40318.4	28.8374	298.356	5.47876	0.0183631	25.3596	Zircon_165	1193	73
Zircon_201	3.09823	3.1556	0.0213026	196.934	4.7584	19414.7	0.459515	2.19569	3.2497	5.74567	10.8763	20.5884	10.7354	55.5701	73.9241	119.971	183.361	268.449	348.887	453.426	576.543	81802.4	246.815	4781.97	3.69274	35.3866	7.15764	0.20227	8.15953	Zircon_201	1196	93
Zircon_202	3.23675	-1.81688	0.101584	3989.12	573.733	19414.7	2.5598	109.871	7.99847	18.2372	44.2357	107.297	74.7868	516.657	1060.01	2007.14	3680.77	6004.65	7867.9	10309.3	12359.2	132332	13133.7	173598	128.298	1284.62	380.876	0.296489	19.9539	Zircon_202	1243	34
Zircon_169	3.37678	3.56992	0.0826236	557.256	5.09898	19414.7	0.383889	5.07396	3.35126	5.97455	12.5167	26.2227	16.2365	108.655	179.73	317.378	544.059	844.388	1115.51	1473.7	1897.72	82548.4	480.431	7907.54	5.86663	58.5158	13.9325	0.238098	13.5631	Zircon_169	1244	57
Zircon_217	3.22719	-0.909079	-0.0237574	1956.72	21.3529	19414.7	2.61697	22.5402	5.10557	12.0706	27.2069	61.3237	27.2246	306.163	588.653	1066.12	1825.83	2873.16	3659.52	4661.1	5742.62	111738	3472.76	48244.9	35.7084	357.012	100.71	0.282091	15.2242	Zircon_217	1256	41
Zircon_214	3.03798	0.512382	0.0742997	1142.82	33.7155	19414.7	0.535863	19.5225	3.72158	5.03657	11.79	27.5991	3.95438	132.522	283.22	570.302	1083.78	1822.95	2617.54	3758.49	4897.13	136983	2167.94	67725.9	45.6311	501.172	62.8702	0.125447	28.3613	Zircon_214	1316	74
Zircon_208	3.14514	-0.236366	0.0724097	3382.18	165.193	19414.7	5.56832	61.089	11.9058	15.9679	37.0383	85.9119	35.997	392.906	845.184	1676.02	3132.34	5177.21	6788.83	8902.15	10670.1	129040	8208.79	87448.2	76.2246	647.116	238.055	0.36787	22.6572	Zircon_208	1330	43
Zircon_191	3.55225	1.13539	0.00455455	931.95	22.1866	19414.7	3.42713	23.9455	10.1937	17.8575	31.808	56.6568	19.8607	181.779	309.626	509.592	847.969	1362.45	1881.64	2598.67	3307.33	126607	6497.68	37994.7	38.7573	281.161	188.433	0.670196	14.2958	Zircon_191	1424	36
Zircon_200	2.82379	1.23387	0.111602	1127.78	16.9562	19414.7	2.2154	61.6583	8.25538	11.799	26.2554	58.424	42.9319	177.143	323.11	572.196	998.549	1625.62	2212.53	3011.35	3909.41	104663	7230.48	47234.8	46.6407	349.538	209.684	0.599889	16.9995	Zircon_200	1573	66
Zircon_196	3.05773	2.97754	0.037352	884.595	5.20489	19414.7	0.478986	6.71201	3.5898	5.53082	12.586	28.6409	5.4675	127.395	235.138	450.553	814.371	1352.97	1828.68	2471.64	3159.65	108219	1854.85	17536	21.9516	129.766	53.7907	0.41452	19.4014	Zircon_196	1745	30

## Sheet: Ch4
AnalysisName	Si	P	Ti	Y	Nb	Zr	La	Ce	Pr	Nd	Pm*	Sm	Eu	Gd	Tb	Dy	Ho	Er	Tm*	Yb	Lu	Hf	Th	U	Pb	Yb/Gd	"Best Age"
Zircon_060	3.76918	0.0279837	0.0113577	319.459	10.7264	19414.7	0.515774	36.5241	3.72371	3.26215	6.61577	13.417	9.86988	35.5627	61.82	136.482	267.496	517.308	875.25	1480.87	2556.14	108771	10045.5	76321.6	12.612	41.641	268.999
Zircon_046	3.90162	3.57637	0.0283994	299.212	9.09762	19414.7	0.956239	5.71417	4.5034	4.98641	10.3262	21.3843	4.12432	68.8805	123.581	190.566	283.704	394.007	487.405	602.942	728.856	111583	1935.41	27315.3	15.7813	8.75345	894
Zircon_002	3.55586	-0.282279	0.0230209	423.039	15.0391	19414.7	1.11154	25.5782	5.18823	7.51319	13.1903	23.1572	18.7593	62.8242	112.843	201.157	351.014	596.804	878.143	1292.11	1765.91	123797	5546.5	127006	67.6404	20.567	916
Zircon_031	3.81133	1.74229	0.066105	255.938	7.62553	19414.7	0.549386	6.27415	4.33712	3.79304	8.32867	18.2879	2.24305	59.7005	99.4275	151.079	223.759	294.038	342.316	398.522	423.52	131030	2538.9	82536.8	46.2482	6.67535	933
Zircon_068	3.30404	-0.647425	-0.044385	43.8397	3.75149	19414.7	0.437538	3.9085	2.48584	3.99431	7.86895	15.5021	8.41483	27.8989	36.9534	37.6483	47.7203	48.234	52.5591	57.2721	60.9296	80615.6	5962.96	154409	89.6602	2.05285	936
Zircon_023	2.93341	0.750716	0.0349785	356.012	8.16478	19414.7	2.82683	15.2657	13.5317	18.4363	28.372	43.6621	62.9743	110.674	175.291	218.493	284.428	378.581	445.335	523.859	641.473	105136	999.896	42004.6	21.6514	4.73335	957
Zircon_040	2.85437	0.352724	-0.0610699	396.771	11.8617	19414.7	0.788559	28.4401	5.72476	9.51726	21.5537	48.8125	9.99305	145.164	212.675	289.034	372.24	426.897	444.119	462.036	526.243	105796	9948.41	51483.4	34.0685	3.18286	962
Zircon_017	3.43933	0.481031	0.0181228	601.103	6.1438	19414.7	1.18409	3.80457	3.83218	4.91142	10.462	22.2855	2.22796	81.416	173.124	320.564	541.98	874.635	1135.92	1475.26	1792.47	127946	1872.91	32153.5	18.9105	18.1201	967
Zircon_095	3.3959	-0.106734	0.0888513	309.373	10.161	19414.7	0.574248	15.8062	4.06341	4.7347	8.87283	16.6277	6.17088	47.6364	87.3929	161.285	273.644	462.277	649.618	912.88	1195.75	95577.1	2512.36	37988.5	22.8802	19.1635	970
Zircon_027	2.97034	0.182415	0.0301267	288.155	12.1157	19414.7	2.28568	9.10891	8.68146	11.3396	21.4392	40.534	36.3324	106.393	156.972	196.652	262.142	319.173	360.168	406.427	447.938	107693	3323.14	49496.8	28.6188	3.82004	971
Zircon_109_5B	3.20794	1.46617	0.0613442	511.257	22.5323	19414.7	0.247822	14.2936	4.57857	6.849	15.9792	37.2803	5.58619	103.6	180.529	295.971	474.174	747.921	977.374	1277.22	1567.97	98632.8	1981.39	16205.8	10.3534	12.3284	971
Zircon_073	3.7405	-2.3597	0.0645084	840.107	5.83016	19414.7	0.46864	4.67209	4.02077	6.80987	15.2844	34.3049	3.6909	135.369	266.006	472.446	805.034	1286.11	1698.16	2242.23	2768.76	103924	1967.3	29483.4	18.6444	16.5639	974
Zircon_085	3.427	-0.0180972	0.0221653	465.013	6.95314	19414.7	0.415787	6.85662	3.5883	5.05479	12.6175	31.4951	3.57985	95.0362	167.668	280.099	429.869	640.803	807.212	1016.83	1284.34	107686	4885.68	58981.2	36.0207	10.6994	987
Zircon_080	3.02633	3.00079	0.0243561	140.165	7.45334	19414.7	0.34469	9.62402	3.83628	4.77164	9.58294	19.2455	3.603	53.5839	71.8881	98.8843	126.572	163.198	191.976	225.828	292.864	99006.2	2213.38	29399	17.9689	4.21446	989
Zircon_092	3.21527	-0.301406	0.0148539	590.717	19.1016	19414.7	0.627776	15.3745	4.47706	9.20858	20.4196	45.2794	8.40028	138.194	222.156	362.254	574.736	850.478	1095.13	1410.15	1748.7	90366	3684.25	32161.7	21.2034	10.2041	990
Zircon_072	3.58732	0.014839	-0.047913	574.576	65.9529	19414.7	0.570417	53.6219	3.48124	3.67102	7.2675	14.3874	4.86761	62.1281	134.759	281.919	545.035	974.385	1470.81	2220.14	2994.07	118195	4057.59	53508.3	32.8104	35.7349	992
Zircon_015	2.99121	0.487944	0.00591371	226.564	9.74452	19414.7	0.634695	9.5504	3.70548	5.12453	9.9859	19.459	9.95992	55.0968	84.9832	133.875	212.807	318.893	420.531	554.563	700.776	96006.1	704.671	31089.4	18.5324	10.0652	996
Zircon_096	3.54898	2.19874	0.0506124	308.249	18.5428	19414.7	0.493082	22.936	4.10769	4.29415	6.97662	11.3348	5.44131	29.7204	65.239	131.308	250.907	486.65	757.522	1179.16	1676.53	107377	7270.09	152251	90.6309	39.6752	1000
Zircon_076	3.30514	4.13322	0.0358017	342.987	8.74307	19414.7	0.506222	12.8824	3.58721	4.90977	10.2169	21.2608	8.59553	62.9867	107.655	182.083	313.246	515.898	710.618	978.833	1292.61	89611.1	2643.19	31731.1	19.6399	15.5403	1003
Zircon_078	2.99409	1.46043	0.0348065	1156.12	9.50827	19414.7	0.675103	4.35208	3.25271	5.39815	13.3001	32.7692	3.81353	141.285	302.201	577.899	1065.59	1768.7	2366.01	3165.03	3997.87	111193	3253.84	59128.9	37.352	22.4017	1018
Zircon_108	3.2898	1.32796	0.0482197	400.128	6.68759	19414.7	0.545218	3.07895	3.95766	4.94062	9.23797	17.2732	5.18995	63.7298	124.545	228.907	362.748	557.55	772.534	1070.41	1370.47	126310	663.255	73995.3	46.0627	16.7961	1019
Zircon_084	3.41742	0.126605	0.0877138	157.5	9.63995	19414.7	1.11781	13.8974	5.54147	9.00414	17.9618	35.831	10.1291	78.8885	97.3773	122.208	156.79	203.134	240.969	285.853	331.119	103696	4192.83	57119.7	30.6495	3.6235	1023
Zircon_077	3.32155	-1.79356	0.00230215	171	12.4831	19414.7	0.517252	16.0035	4.79462	5.69794	11.2455	22.1942	7.06406	63.532	93.589	117.041	160.338	204.838	234.053	267.435	305.411	112980	1809.04	23927.4	13.8521	4.20945	1023
Zircon_105	3.24496	-2.40173	0.000594402	500.109	14.3729	19414.7	0.543123	11.6016	4.40984	8.50754	17.54	36.1623	8.3197	102.619	167.99	290.103	481.596	762.395	1014.85	1350.89	1688.9	90848.2	2152.74	34765.3	22.813	13.1642	1024
Zircon_054	2.71994	0.072862	0.202828	135.266	6.18384	19414.7	0.711768	5.46097	4.14547	5.12532	10.1016	19.9094	13.0707	46.6859	64.4512	83.7061	120.553	183.74	249.521	338.853	472.565	106813	1039.28	33104	19.8393	7.25814	1029
Zircon_014	2.90661	-0.732477	0.0259935	423.936	9.58673	19414.7	3.60432	28.9999	7.2903	14.8245	27.1716	49.8024	36.8078	122.494	181.805	261.594	408.426	588.831	768.807	1003.79	1258.8	86805.6	4767.35	39441.1	25.4218	8.19463	1031
Zircon_053	3.03568	3.89928	0.0796406	300.778	8.5534	19414.7	2.47529	10.7796	7.96201	8.63407	14.5201	24.4188	32.3926	49.4188	86.6627	151.843	235.084	424.734	635.143	949.787	1316.91	108116	2952.05	87460.4	52.0172	19.2191	1043
Zircon_037	3.55732	-0.829207	0.0279208	275.504	8.97648	19414.7	0.734276	6.82613	3.78655	4.21268	8.79961	18.381	5.80524	58.4269	95.8147	156.314	250.344	380.16	496.453	648.321	821.457	105697	1025.64	21201.6	12.1367	11.0963	1044
Zircon_038	3.25892	1.71868	0.0226808	785.949	9.24189	19414.7	32.7407	30.6342	21.7361	22.6498	38.9796	67.0825	18.0142	204.905	305.15	489.772	764.51	1117.17	1400.99	1756.92	2136.13	90912.6	830.92	6714.06	4.40471	8.57432	1048
Zircon_032	3.64483	0.411589	-0.00156008	396.596	10.6267	19414.7	1.9218	9.00542	9.54494	12.2455	21.5989	38.0968	32.8923	87.881	144.542	221.251	336.73	493.53	637.991	824.736	1028.57	124879	8520.93	55568.5	32.1042	9.38469	1060
Zircon_074	4.00306	2.60453	0.09915	858.907	9.11108	19414.7	21.3471	14.1635	27.7593	34.8233	54.093	84.0257	98.4205	233.97	347.547	534.761	780.173	1143.65	1478.01	1910.13	2413.57	117753	5487.37	136418	77.4606	8.16398	1062
Zircon_052	3.50555	0.911263	0.0774517	360.071	12.2798	19414.7	2.07342	6.15286	8.3816	11.8224	21.9201	40.6424	37.76	126.023	209.62	268.57	303.792	376.028	460.329	563.529	682.523	125758	1924.15	128280	84.3187	4.47163	1065
Zircon_051	3.30665	0.779235	-0.0140924	1131.74	30.8117	19414.7	0.827952	20.4389	6.46944	13.1327	29.7259	67.2848	21.2626	240.271	419.788	679.373	1102.83	1592.88	1985.83	2475.71	2925.73	118415	3962.29	58675.9	38.7327	10.3038	1076
Zircon_098	3.37489	-0.276049	-0.000302138	380.478	8.75582	19414.7	0.917221	13.6031	3.70851	5.43634	9.79657	17.6539	6.41128	65.5796	115.47	199.646	356.074	577.895	815.268	1150.14	1473.93	93656.5	1981.43	28713	18.5504	17.5381	1081
Zircon_059	3.47128	-0.421692	0.0859674	1015.27	7.03417	19414.7	0.670761	4.86727	3.99778	4.89235	12.2658	30.7519	2.27161	129.89	282.49	526.209	943.528	1549.81	2039.49	2683.89	3252.94	114712	3089.94	47429.4	34.103	20.6628	1081
Zircon_056	3.40127	3.14062	0.0949739	734.138	132.743	19414.7	0.413671	14.1703	3.4688	3.006	6.55396	14.2896	3.37388	58.6771	142.164	316.523	647.67	1178.11	1676.69	2386.27	2989.74	114512	1846.31	58013.7	38.1316	40.6679	1085
Zircon_101	3.77851	2.08017	0.035784	251.378	8.42307	19414.7	0.375523	13.8461	3.91203	4.9011	9.27508	17.5526	5.85444	49.3026	85.0476	147.05	234.827	350.348	455.284	591.65	733.26	90160.9	980.612	17953.8	11.5104	12.0004	1088
Zircon_083	3.43742	-1.59944	0.0814015	196.229	20.8346	19414.7	0.6713	30.1349	3.05907	2.96157	4.22458	6.02621	2.99998	19.4833	35.9128	68.2193	148.634	310.62	520.155	871.036	1404.62	110870	2295.59	80084.2	50.9906	44.7067	1088
Zircon_099	3.29721	3.35501	0.311945	415.855	9.70861	19414.7	144.399	104.332	75.5887	52.9007	52.5694	52.2402	15.6977	119.899	172.819	260.227	397.445	564.097	710.655	895.29	1089.1	89077	904.67	11083.4	7.24292	7.46702	1089
Zircon_079	3.23887	0.508638	0.000287438	650.796	9.30642	19414.7	0.770675	8.16478	6.20817	13.3626	26.1841	51.308	14.9373	170.167	261.789	411.109	638.111	912.716	1135.67	1413.09	1741.37	85950.8	1328.23	13096.9	8.29695	8.30413	1089
Zircon_041	3.31974	-2.22248	0.00559085	884.479	8.14623	19414.7	10.9116	14.3296	19.6861	36.0253	50.4965	70.7808	61.3639	217.917	336.982	476.536	803.088	1273.34	1662	2169.27	2688.34	111197	2293.25	34493.8	22.8762	9.95457	1092
Zircon_050	3.23617	0.423332	-0.0234562	1321.56	6.02336	19414.7	0.403671	3.78879	3.35298	5.96291	15.4951	40.2651	3.82006	201.464	394.56	702.349	1229	1929.54	2451.36	3114.3	3830.61	103667	3061.65	34835.7	23.5897	15.4583	1093
Zircon_104	3.47465	0.74006	0.0922617	544.96	8.56626	19414.7	0.533227	4.7242	3.82576	3.74588	8.48397	19.2152	2.06663	58.125	136.091	257.057	492.354	849.064	1186.79	1658.84	2165.83	114031	1972.68	49319.3	33.0139	28.5392	1096
Zircon_100	3.79064	1.30524	0.0409859	450.786	23.728	19414.7	0.495256	17.0937	4.69248	5.09244	10.7796	22.8179	3.82169	84.5343	147.704	256.637	432.064	691.376	914.991	1210.93	1480.72	105937	2585.48	34166.4	24.1873	14.3247	1097
Zircon_019	3.75825	1.27783	0.0816101	411.63	19.2368	19414.7	0.342396	5.49273	3.06167	3.562	8.06822	18.2752	2.46612	59.0793	109.35	206.105	380.771	616.705	858.313	1194.58	1551.74	132701	1806.12	34879.5	24.4966	20.2199	1099
Zircon_018	3.12556	0.238238	0.0945505	291.247	10.7739	19414.7	0.370405	4.23747	3.42893	4.10638	9.30151	21.0692	3.54864	67.8065	105.112	163.378	259.909	393.753	513.423	669.464	858.85	133127	1831.27	39009.3	26.5758	9.87314	1104
Zircon_088	3.54999	-0.131844	0.0174517	505.44	8.4964	19414.7	0.6547	7.12335	4.71531	7.88538	18.7676	44.6678	4.67212	145.34	214.824	315.919	476.661	687.189	860.779	1078.22	1320.23	107627	4574.57	35795.3	25.6236	7.41862	1110
Zircon_071	3.8385	1.12709	0.00628888	357.416	12.4638	19414.7	0.445985	9.40226	3.69863	3.29446	6.6253	13.3237	8.14951	36.2797	81.7336	158.276	306.664	562.159	882.898	1386.64	1944.13	112360	5379.08	112940	75.5037	38.2207	1110
Zircon_093	3.18264	2.68722	0.0727956	317.674	7.63905	19414.7	0.405146	15.2009	2.66937	3.4418	6.34023	11.6795	4.34428	33.4443	74.3851	146.283	282.988	519.402	774.292	1154.26	1544.25	100955	4134.55	108651	74.5146	34.5131	1122
Zircon_091	3.24589	3.66747	0.00894426	471.151	11.9591	19414.7	2.18879	10.2213	10.0068	13.2623	24.4587	45.1074	44.1576	109.301	189.967	277.755	434.409	651.307	845.387	1097.3	1360.42	97129	913.175	14448.9	9.88248	10.0392	1124
Zircon_045	3.58153	-1.96521	0.0563974	567.503	19.5275	19414.7	0.429227	16.1441	4.17225	6.35836	13.822	30.0466	2.29948	101.679	194.116	331.093	552.918	866.348	1147.1	1518.83	1856.01	123231	2747.79	51215.6	35.5355	14.9374	1126
Zircon_020	3.58592	1.10904	0.0797665	279.277	9.4335	19414.7	0.296144	14.3474	2.8257	4.27914	7.81406	14.2691	5.14187	36.8394	70.3043	141.061	260.341	451.875	658.286	958.984	1307.16	102826	2003.61	37401.9	25.6222	26.0315	1129
Zircon_089	3.71708	-2.0672	0.0741519	690.738	9.1006	19414.7	0.587649	3.82998	2.69661	3.8318	7.93423	16.4288	0.74802	78.7266	184.343	367.156	626.516	975.634	1255.6	1615.91	1928.6	123125	2819.75	55169.1	37.2421	20.5255	1133
Zircon_036	3.44027	-1.39739	0.0255819	219.234	7.19105	19414.7	0.300933	11.7082	3.88797	3.47139	5.86121	9.89628	3.88075	26.6634	51.9155	100.405	189.063	340.213	511.62	769.385	1036.49	99302	1858.09	30835.7	22.0911	28.8555	1137
Zircon_026	3.03033	1.51449	0.0106957	695.782	9.27048	19414.7	0.653474	8.55234	5.64517	11.0252	24.5718	54.7629	12.1219	169.924	263.965	416.531	660.831	963.969	1196.93	1486.2	1795.14	99334.4	2395.75	19249	13.9666	8.74625	1140
Zircon_075m	3.26957	0.45853	0.126211	2331.97	28.1264	19414.7	0.941811	33.558	8.38475	18.0409	41.6533	96.1701	23.1362	384.034	727.878	1290.77	2233.51	3451.68	4338.23	5452.48	6545.87	94853.5	19134.4	146850	111.147	14.1979	1142
Zircon_039	3.19921	-2.92006	-0.050002	588.765	20.7501	19414.7	0.24852	22.8664	3.56689	4.86859	10.8952	24.382	3.84519	82.209	160.869	311.018	565.119	927.038	1257.73	1706.4	2169.84	111824	3147.42	27165.3	20.1764	20.7568	1142
Zircon_029	3.3112	-0.19198	-0.0115475	417.692	7.18992	19414.7	0.440207	3.47421	3.44588	3.8728	7.92153	16.2029	2.49265	58.3122	113.895	204.843	360.902	613.362	873.393	1243.66	1679.35	107608	2012.34	57807.4	40.5411	21.3277	1142
Zircon_043	3.68136	0.685726	0.102079	471.291	11.5522	19414.7	0.741083	7.69445	4.31748	5.46729	12.1297	26.911	4.5969	89.9104	160.228	262.665	452.187	702.522	932.145	1236.82	1495.84	99711.1	1050.35	14971.8	10.4761	13.7561	1143
Zircon_087	3.29733	0.902629	0.0233827	769.287	8.36704	19414.7	0.988756	11.2876	9.14108	21.1636	41.0338	79.5598	14.6591	238.289	337.035	508.566	762.257	1076.39	1329.58	1642.32	2016.3	86688.3	3411.5	23959.3	17.8614	6.89215	1147
Zircon_065	3.10277	1.18836	0.0158118	713.249	8.88689	19414.7	0.920591	5.58745	4.72636	7.07055	14.1285	28.232	7.55532	99.9248	204.814	370.627	660.461	1069.12	1402.43	1839.67	2335.31	109123	4145.59	41280.2	27.6304	18.4105	1149
Zircon_049	3.13794	-0.545025	0.0685552	920.476	10.9924	19414.7	0.81078	4.52652	4.38082	6.47935	16.0566	39.7904	4.55093	161.533	313.58	514.71	796.634	1202.4	1578.42	2072.03	2560.33	122627	3773.17	96761.1	66.0421	12.8273	1150
Zircon_025	3.13839	-2.57806	0.0318978	778.176	6.90795	19414.7	0.449578	3.23621	3.29065	4.83913	10.5186	22.8637	2.00386	88.9606	191.947	375.735	689.44	1183.82	1623.72	2227.08	2821.07	120368	2135.07	43312.3	31.1021	25.0345	1151
Zircon_010	3.11227	0.076804	-0.0494337	1057.23	8.54199	19414.7	0.677383	12.0282	5.69407	13.3564	29.6584	65.8573	16.5168	205.186	361.503	590.133	972.55	1486.32	1881.01	2380.5	2897.69	95140	3313.84	35875.1	26.1367	11.6017	1152
Zircon_016	3.50455	-1.92963	0.0126399	358.269	8.67431	19414.7	38.6958	59.9226	32.9396	27.591	29.7302	32.0354	24.634	64.4037	98.9484	167.208	301.074	530.051	823.737	1280.15	1937.6	101627	3867.38	67924.1	47.2335	19.8769	1153
Zircon_106	3.35926	-0.287546	0.0440463	1036.84	7.78539	19414.7	0.53314	4.26306	4.47692	5.89223	14.0868	33.6779	2.21882	145.695	302.867	555.816	997.549	1597.15	2122.32	2820.17	3414.32	114637	2455.47	41227.1	30.2925	19.3566	1158
Zircon_081	3.41738	0.941953	0.033657	1321.57	9.48686	19414.7	1.51348	11.4342	7.00282	10.53	21.5133	43.9529	17.0074	174.542	356.964	681.462	1231.86	1993.56	2689.42	3628.18	4576.66	112798	5525.66	55208.5	39.5687	20.7869	1161
Zircon_061	4.2725	1.61935	0.0528191	857.074	9.54667	19414.7	0.394331	4.83507	4.25336	4.70503	11.5448	28.3278	2.60895	125.921	236.067	460.572	819.658	1330.33	1746.13	2291.89	2837.66	105438	3533.46	48830.3	39.4378	18.2011	1165
Zircon_012	3.01979	2.83685	-0.04007	334.855	9.91897	19414.7	2.95341	11.3064	7.71974	10.7887	17.2286	27.5126	24.7284	78.0685	112.803	176.212	299.649	464.193	619.174	825.899	1033.84	92092.4	1091.01	13970.3	9.66924	10.5792	1168
Zircon_006	3.2834	4.96266	-0.0149416	305.496	11.6091	19414.7	0.503387	7.6387	4.17186	5.51957	10.9433	21.6968	8.71545	68.6898	108.252	180.22	293.608	441.021	575.737	751.602	921.977	102873	1085.15	16447.8	11.4809	10.942	1170
Zircon_024	3.27567	-2.18688	0.00473378	337.132	9.8841	19414.7	0.34118	14.1635	3.70725	4.68587	9.10627	17.6967	5.03589	54.5122	94.9626	164.498	301.38	487.407	682.958	956.965	1243.24	100704	1703.02	25956.4	18.9593	17.5551	1173
Zircon_062	3.83778	1.36138	0.0699621	681.636	8.13452	19414.7	0.535123	10.0344	6.55319	12.238	26.6646	58.0974	17.4264	168.98	269.906	434.721	683.964	991.089	1249.05	1574.16	1889.29	84547.4	1675.9	14533.7	11.2636	9.31563	1183
Zircon_035	3.12429	-2.12452	-0.0231664	536.534	9.13567	19414.7	0.500357	11.0493	4.49844	8.71989	18.963	41.2384	13.8241	122.652	197.646	314.468	508.656	757.848	990.825	1295.42	1586.84	93806.2	1451.37	15273.1	11.1035	10.5618	1183
Zircon_086	3.34501	3.66493	0.0130701	383.627	6.93831	19414.7	4.45096	7.3573	4.73176	4.33788	8.42102	16.3475	3.25849	53.6793	105.767	195.079	358.653	594.141	803.91	1087.74	1345.04	98473.5	1334.62	18414.8	13.5665	20.2637	1183
Zircon_058	3.53984	0.679376	0.0121018	525.188	6.52559	19414.7	0.24394	3.81121	3.20039	3.21513	8.59378	22.9705	2.7557	73.8759	148.859	279.137	492.328	799.581	1068.61	1428.16	1801.27	96605.1	1499.04	20214.9	15.5936	19.3319	1186
Zircon_107	3.35058	0.208439	-0.0239851	728.715	13.1757	19414.7	0.672897	9.25892	3.52251	6.62117	13.2661	26.5797	9.85879	110.385	213.428	385.737	686.666	1104.12	1489.48	2009.33	2613.71	100707	2550.84	44519.5	34.3822	18.2029	1188
Zircon_069	3.39845	-2.61731	-0.000451614	2887.92	21.6037	19414.7	1.28929	18.8198	8.96418	21.0838	50.0611	118.864	9.5144	508.413	935.105	1624.22	2740.55	4141.23	5094.46	6267.11	7514.44	84710	18367.7	122541	100.87	12.3268	1190
Zircon_055	3.49471	-2.73047	0.050858	1406.41	19.6331	19414.7	1.98919	17.02	8.1814	15.7558	33.4667	71.0862	22.6678	268.123	494.906	839.534	1368.52	2086.42	2646.96	3358.09	4099.98	98221.3	5458.52	44855	33.6689	12.5244	1190
Zircon_102	3.42336	2.74695	-0.0642813	783.378	6.1424	19414.7	0.354592	4.54252	3.94293	4.23644	9.96969	23.4619	2.13937	110.424	209.727	398.458	728.772	1206.03	1627.07	2195.11	2701.76	114216	2373.86	39195.6	28.9217	19.879	1190
Zircon_030	3.33233	-1.79383	-0.0116201	714.016	11.893	19414.7	2.31789	15.3843	6.72882	10.784	19.3533	34.7321	26.1247	121.881	216.687	375.342	654.202	1058.8	1411.45	1881.57	2391.48	114389	3913.08	74083.5	50.8424	15.4378	1198
Zircon_082	3.37655	-0.36071	0.101042	643.311	6.69826	19414.7	0.649255	8.20813	4.5703	6.43101	15.3242	36.5153	10.2211	114.968	210.771	364.567	594.084	935.738	1216.69	1581.99	1959.52	103677	2467.45	30207.4	21.3372	13.7602	1202
Zircon_013	3.02774	0.0934142	-0.00592969	961.121	7.57416	19414.7	0.480585	8.23272	4.84754	9.68579	22.2306	51.023	28.3661	199.954	342.495	568.341	913.624	1364.33	1722.7	2175.21	2634.63	89691.1	1869.82	14968	12.43	10.8785	1203
Zircon_005	3.44025	-0.469134	0.0581862	1508.2	7.53275	19414.7	0.499755	5.74327	4.40105	11.4375	27.1835	64.6072	3.29769	266.615	486.286	838.167	1400.58	2161.33	2706.97	3390.36	4050.99	111551	3780.54	37639.7	28.8282	12.7163	1208
Zircon_048	3.16184	-0.631077	0.0686966	1266.57	4.39442	19414.7	0.427317	4.70403	4.56651	11.4127	26.9357	63.5724	6.14666	240.503	426.334	717.999	1177.87	1807.98	2292	2905.61	3542.49	101044	2729.84	27044.4	20.908	12.0814	1209
Zircon_090	3.18064	-0.660314	-0.0628774	1776.05	11.6213	19414.7	0.549576	6.63064	6.15894	13.907	33.2364	79.4321	13.5287	314.875	582.074	999.129	1742.49	2705.2	3500.71	4530.17	5619.87	91566.6	4503.91	48551.5	38.332	14.3872	1211
Zircon_004	3.50234	-3.79697	-0.00463444	494.505	8.55261	19414.7	0.435911	8.66803	2.89714	4.22915	9.15204	19.8054	5.0791	70.651	133.552	249.367	462.824	739.286	998.669	1349.06	1672.92	99712	1584.77	19967.7	15.3136	19.0946	1216
Zircon_011	2.74551	-0.434402	-0.038337	443.422	11.6428	19414.7	1.61928	11.7858	4.51925	6.81964	13.3192	26.0134	8.20193	85.1289	147.857	244.579	411.707	637.307	824.458	1066.57	1314.18	89409.8	1463.19	14804.2	10.8673	12.5289	1217
Zircon_001_5B	3.58498	1.15384	0.0545855	332.785	10.1913	19414.7	0.407078	10.2813	3.03584	5.05455	9.35722	17.3226	6.0072	56.407	101.692	174.892	300.522	472.54	632.878	847.619	1079.07	97019.7	1018.9	12648	9.14573	15.0269	1231
Zircon_094	3.01224	1.99008	-0.0088583	505.051	9.32795	19414.7	0.603257	18.4703	6.03797	9.74115	18.9203	36.7491	17.8625	113.927	182.561	288.701	484.622	731.1	955.065	1247.64	1542.63	84787.9	1479.23	11749	8.99935	10.9512	1248
Zircon_003	3.26556	-3.1051	0.0238572	852.087	17.4506	19414.7	196.831	150.756	103.01	82.2363	70.449	60.3512	10.2843	153.808	260.874	446.262	791.376	1298.07	1733.78	2315.75	2844.91	116288	5971.39	82132.5	57.1685	15.0561	1262
Zircon_097	3.27837	1.80922	-0.0232558	538.178	51.0887	19414.7	0.617868	23.2317	3.61936	4.06014	7.85553	15.1988	2.52826	58.4889	128.694	255.733	484.257	865.021	1268.13	1859.08	2483.75	129852	2890.32	103367	77.528	31.7852	1281
Zircon_033	3.42866	3.16778	-0.0329958	484.855	12.6516	19414.7	0.594211	19.0668	3.98877	6.33654	12.975	26.5683	12.1207	81.3839	145.249	270.691	464.313	748.436	1015.2	1377.04	1708.19	98341.1	926.844	10684.4	7.79613	16.9203	1290
Zircon_028	3.06508	-1.79167	0.0215715	1092.08	7.77598	19414.7	7.42341	18.9127	20.5391	28.9192	50.5311	88.2938	105.897	247.922	404.853	636.023	974.356	1398.62	1770.94	2242.38	2697.8	104485	2749.24	45047.2	30.6623	9.0447	1302
Zircon_070	3.47133	-0.328416	0.0767648	281.638	3.45208	19414.7	0.288152	3.30911	3.07556	3.81855	6.12103	9.81183	5.76004	31.7482	65.4471	129.197	255.421	448.413	659.801	970.838	1386.03	97385	433.718	10616.5	8.03814	30.5793	1307
Zircon_007	3.43604	-1.18948	0.0358884	697.752	16.6167	19414.7	0.399801	7.79801	4.34548	8.93627	19.5404	42.7278	7.22056	143.621	234.476	403.292	659.705	982.004	1268.12	1637.59	2021.55	103428	465.968	6005.13	4.53185	11.4021	1313
Zircon_022	3.16806	-0.635026	-0.00285956	554.829	19.5858	19414.7	0.367375	48.176	3.72108	5.01273	10.7398	23.0101	6.60366	78.454	146.381	279.975	503.48	850.394	1233.9	1790.37	2386.16	106295	3982.59	36405.4	31.6318	22.8206	1331
Zircon_064	3.11842	-0.00948839	0.0457875	664.223	22.3394	19414.7	43.8821	60.9447	45.9826	42.373	43.6893	45.0465	6.77532	118.069	201.247	352.763	630.65	1025.91	1368.42	1825.29	2263.16	101964	1594	22683.9	18.1259	15.4595	1348
Zircon_009	3.27879	1.98783	0.029586	406.429	7.71913	19414.7	0.544525	24.0931	4.35822	5.94046	12.4296	26.0072	10.7152	81.0992	134.204	218.449	360.283	561.048	749.659	1001.68	1248.42	96598.1	2765.5	17828.7	18.8516	12.3513	1493
Zircon_021	3.24221	3.29498	-0.00249553	704.843	17.872	19414.7	0.648147	11.3447	4.27727	8.39102	17.1181	34.9217	7.34967	137.087	225.333	389.573	665.643	1042.43	1368.37	1796.23	2201.02	91850.6	2762.17	38496.5	39.5435	13.1028	1635
									Highest Yb/Gd										Lowest Yb/Gd		They correspond to analyses between 940 and 1070 aprox
									The four highest
									have ages around
									1100 Ma
